# Supplementary figures and images for: EGF-dependent re-routing of vesicular recycling switches spontaneous phosphorylation suppression to EGFR signaling
Source: eLife journal article supplement (doi:10.7554/elife.12223), 2015-11-26

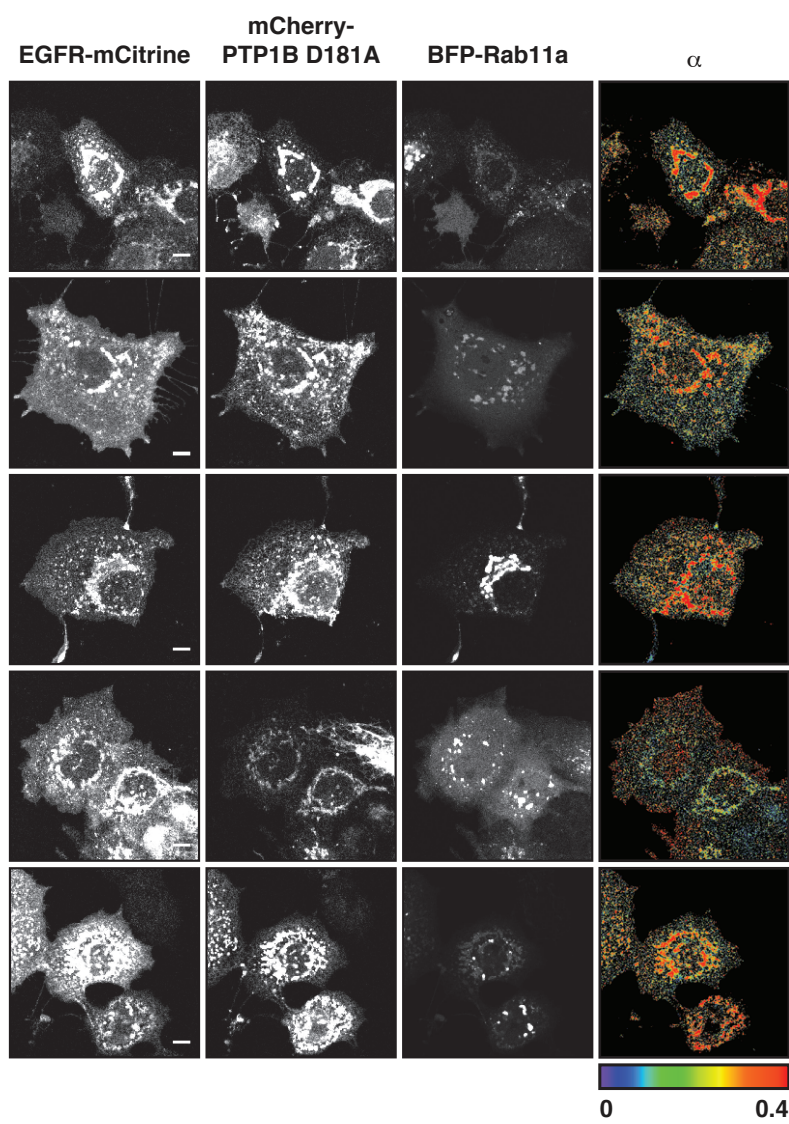

Figure 4 - figure supplement 3

Supplement: supp [file elife-12223-supp-v1.zip]

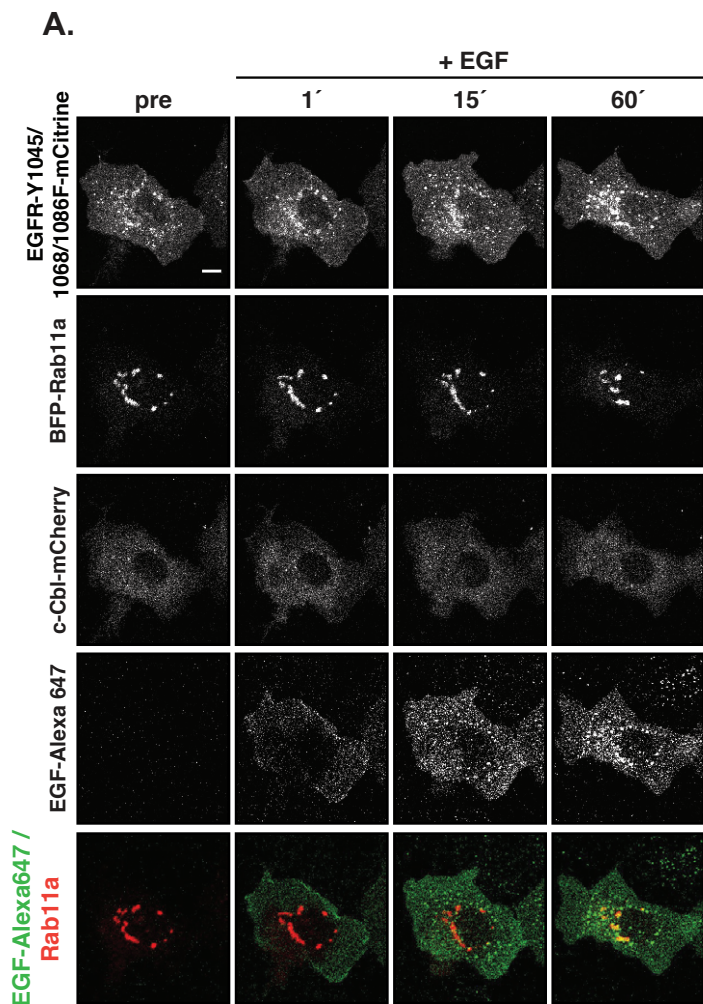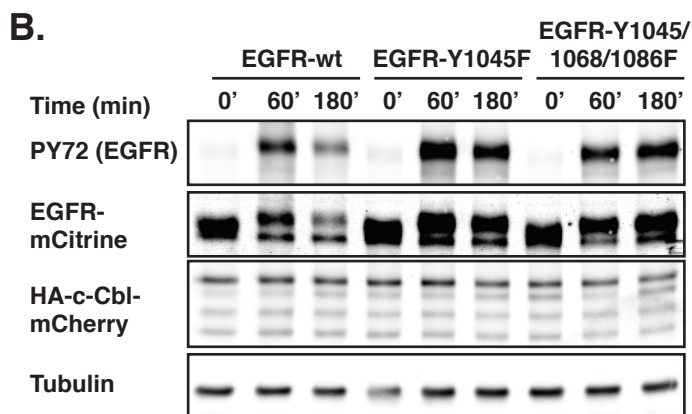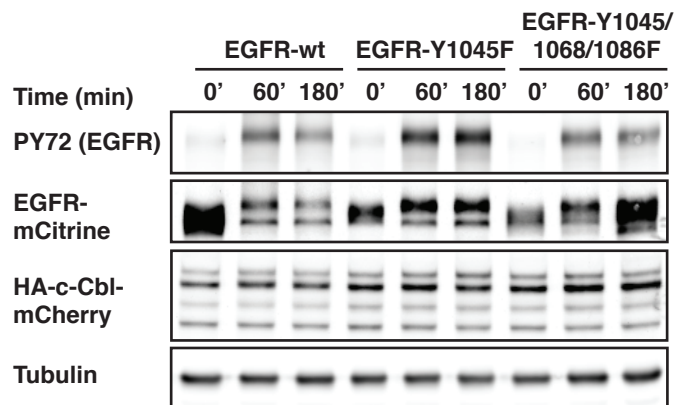

**C.**

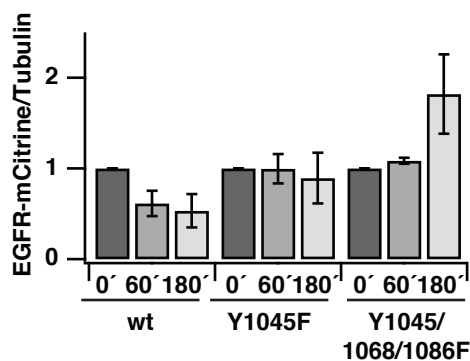

Figure 5 - figure supplement 3

Supplement: supp [file elife-12223-supp-v1.zip]

**A.**

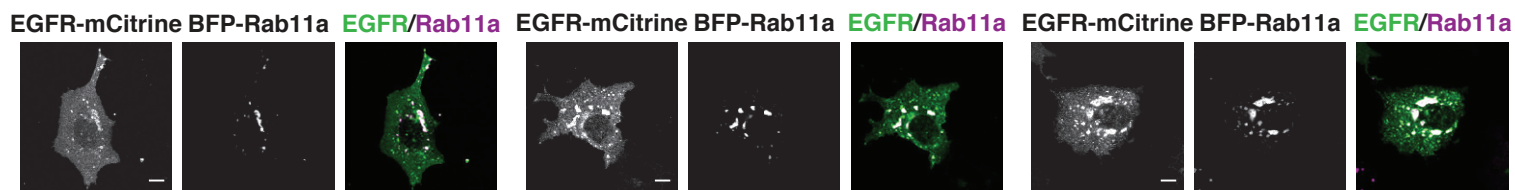

**B.**

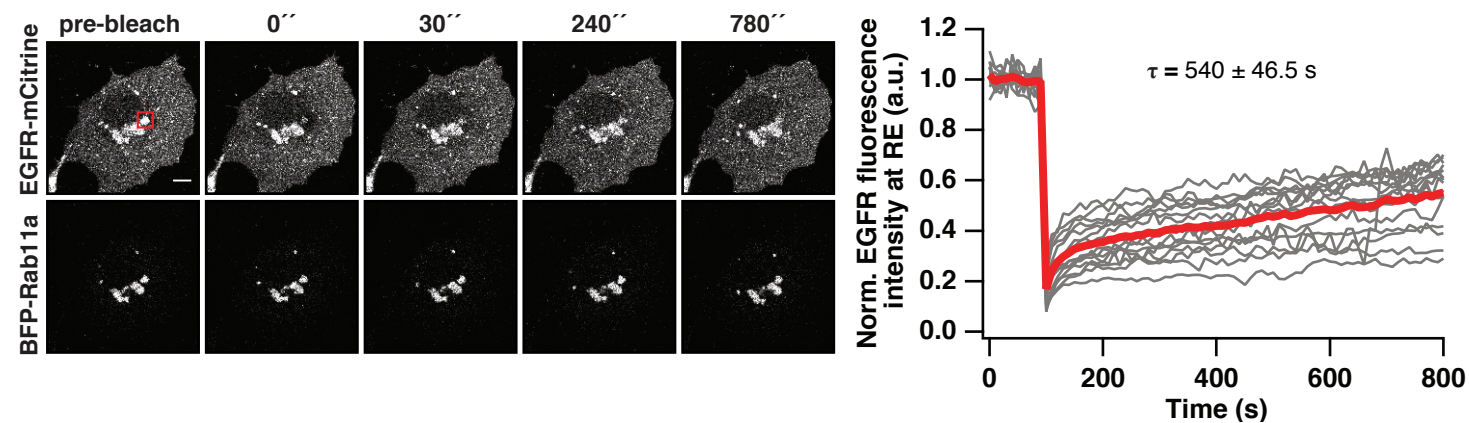

**C.**

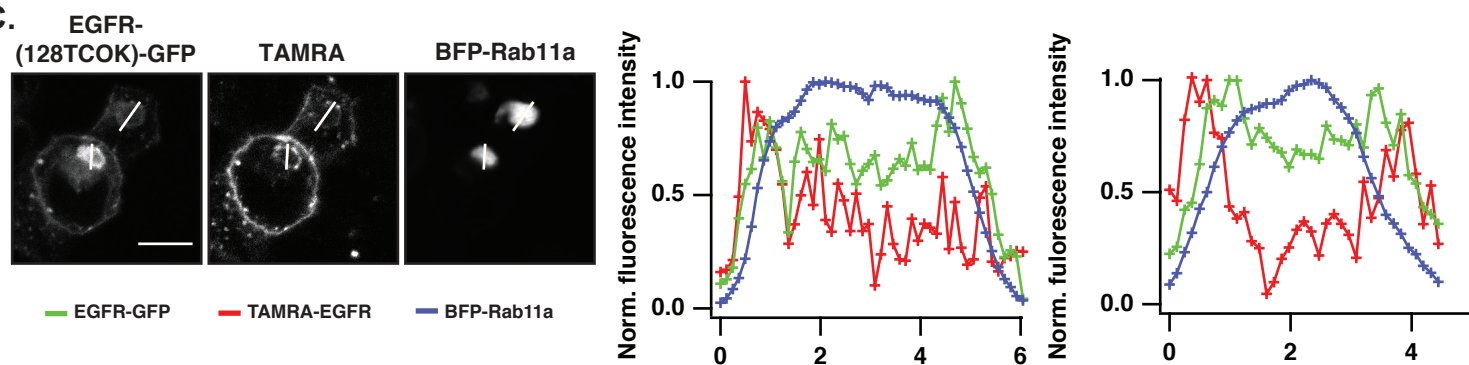

**D.**

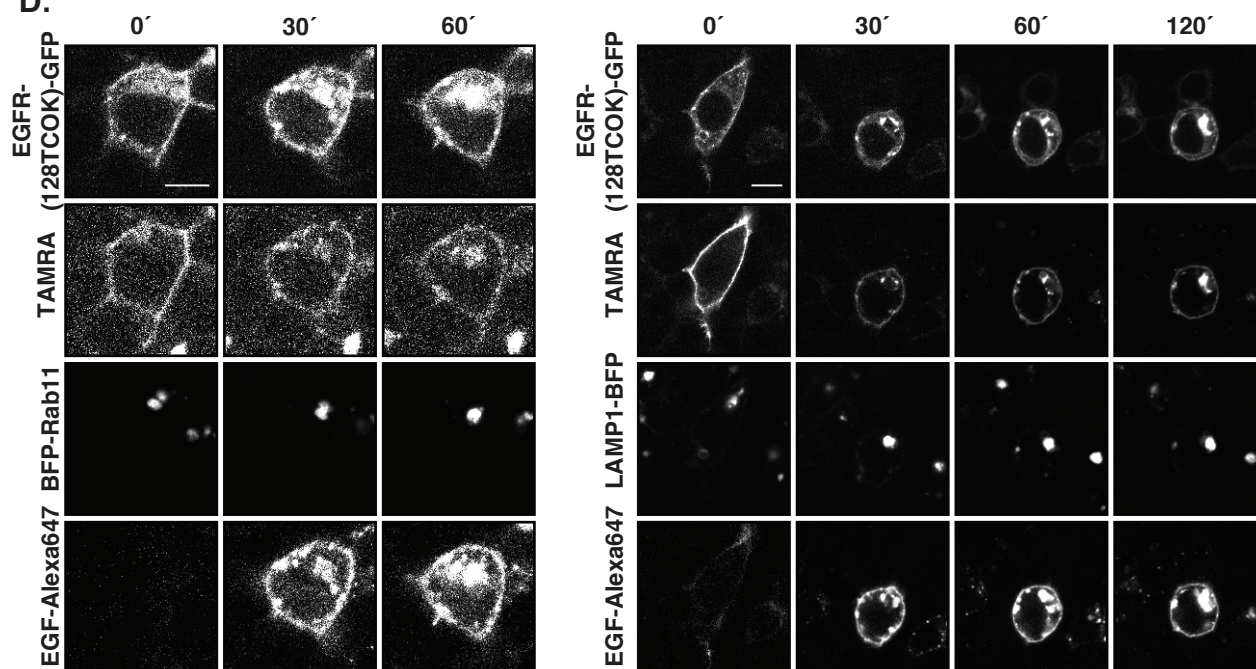

Figure 3 - figure supplement 1

Supplement: supp [file elife-12223-supp-v1.zip]

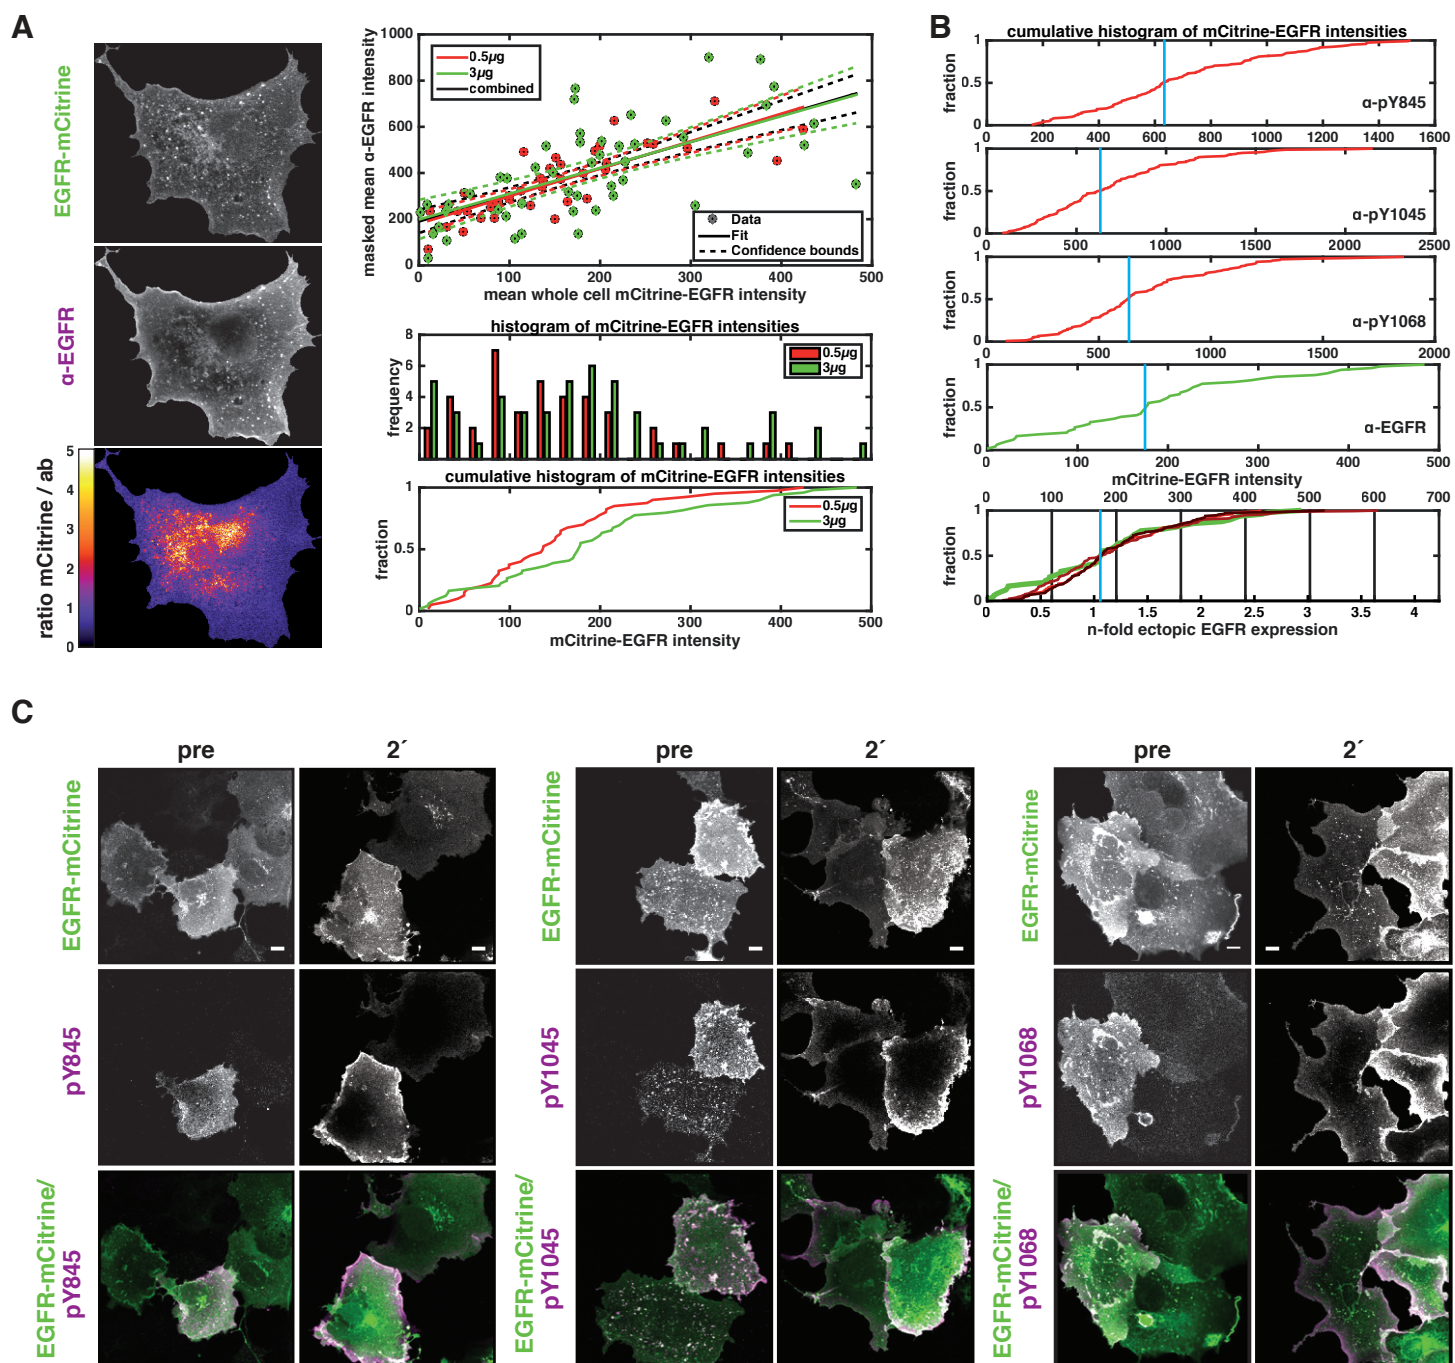

Figure 1- figure supplement 1

Supplement: supp [file elife-12223-supp-v1.zip]

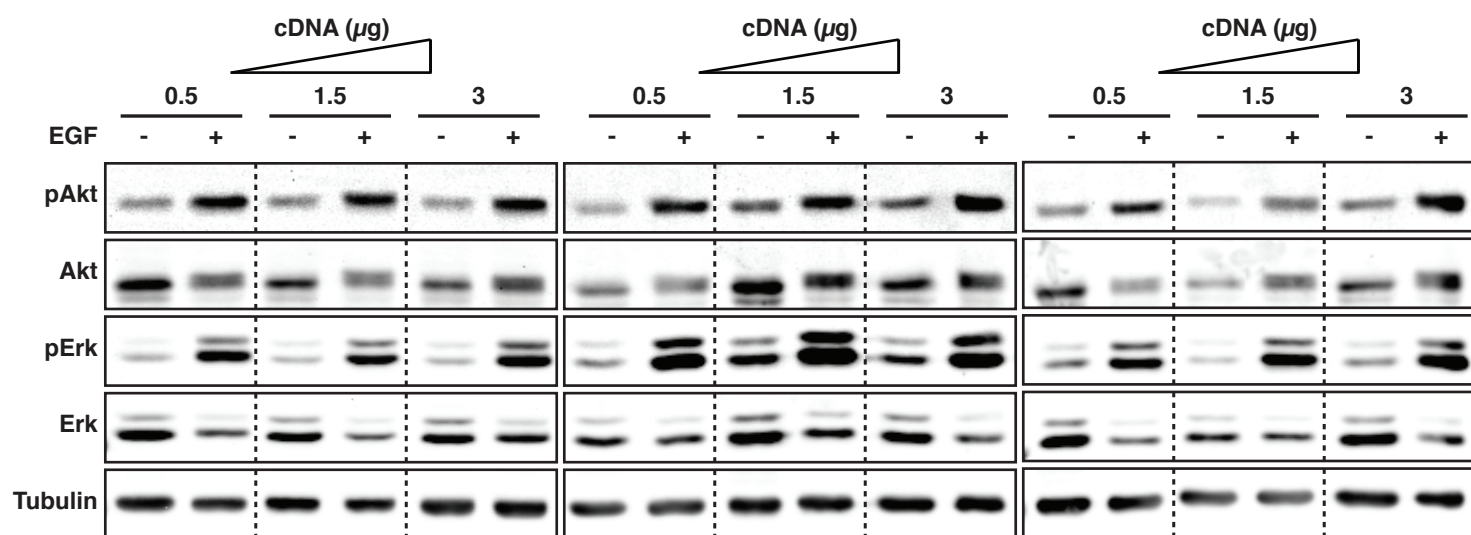

Figure 1- figure supplement 4

Supplement: supp [file elife-12223-supp-v1.zip]

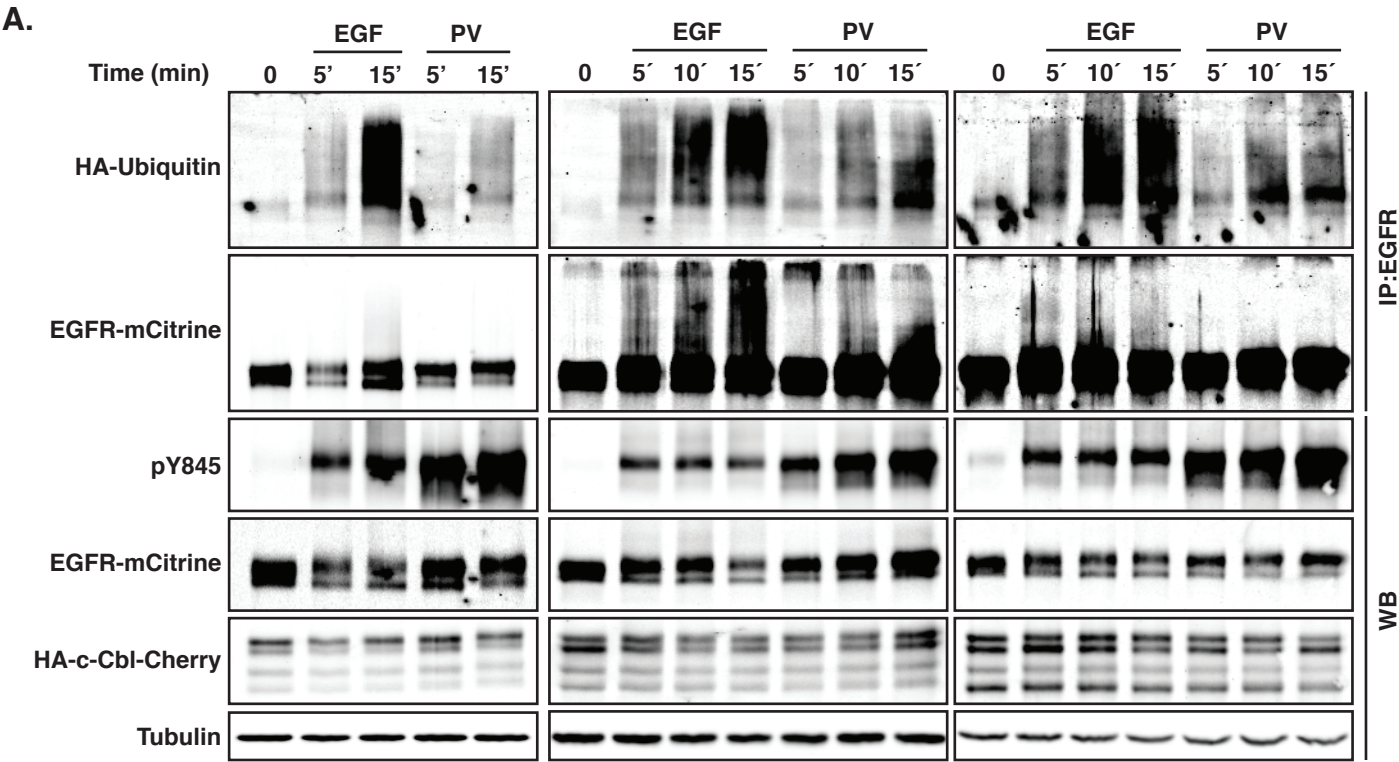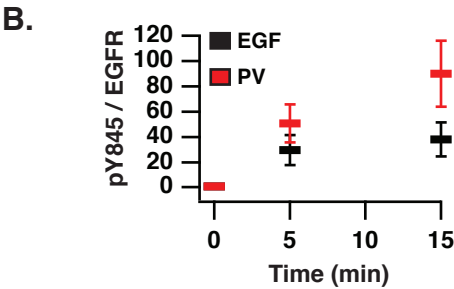

Figure 5 - figure supplement 1

Supplement: supp [file elife-12223-supp-v1.zip]

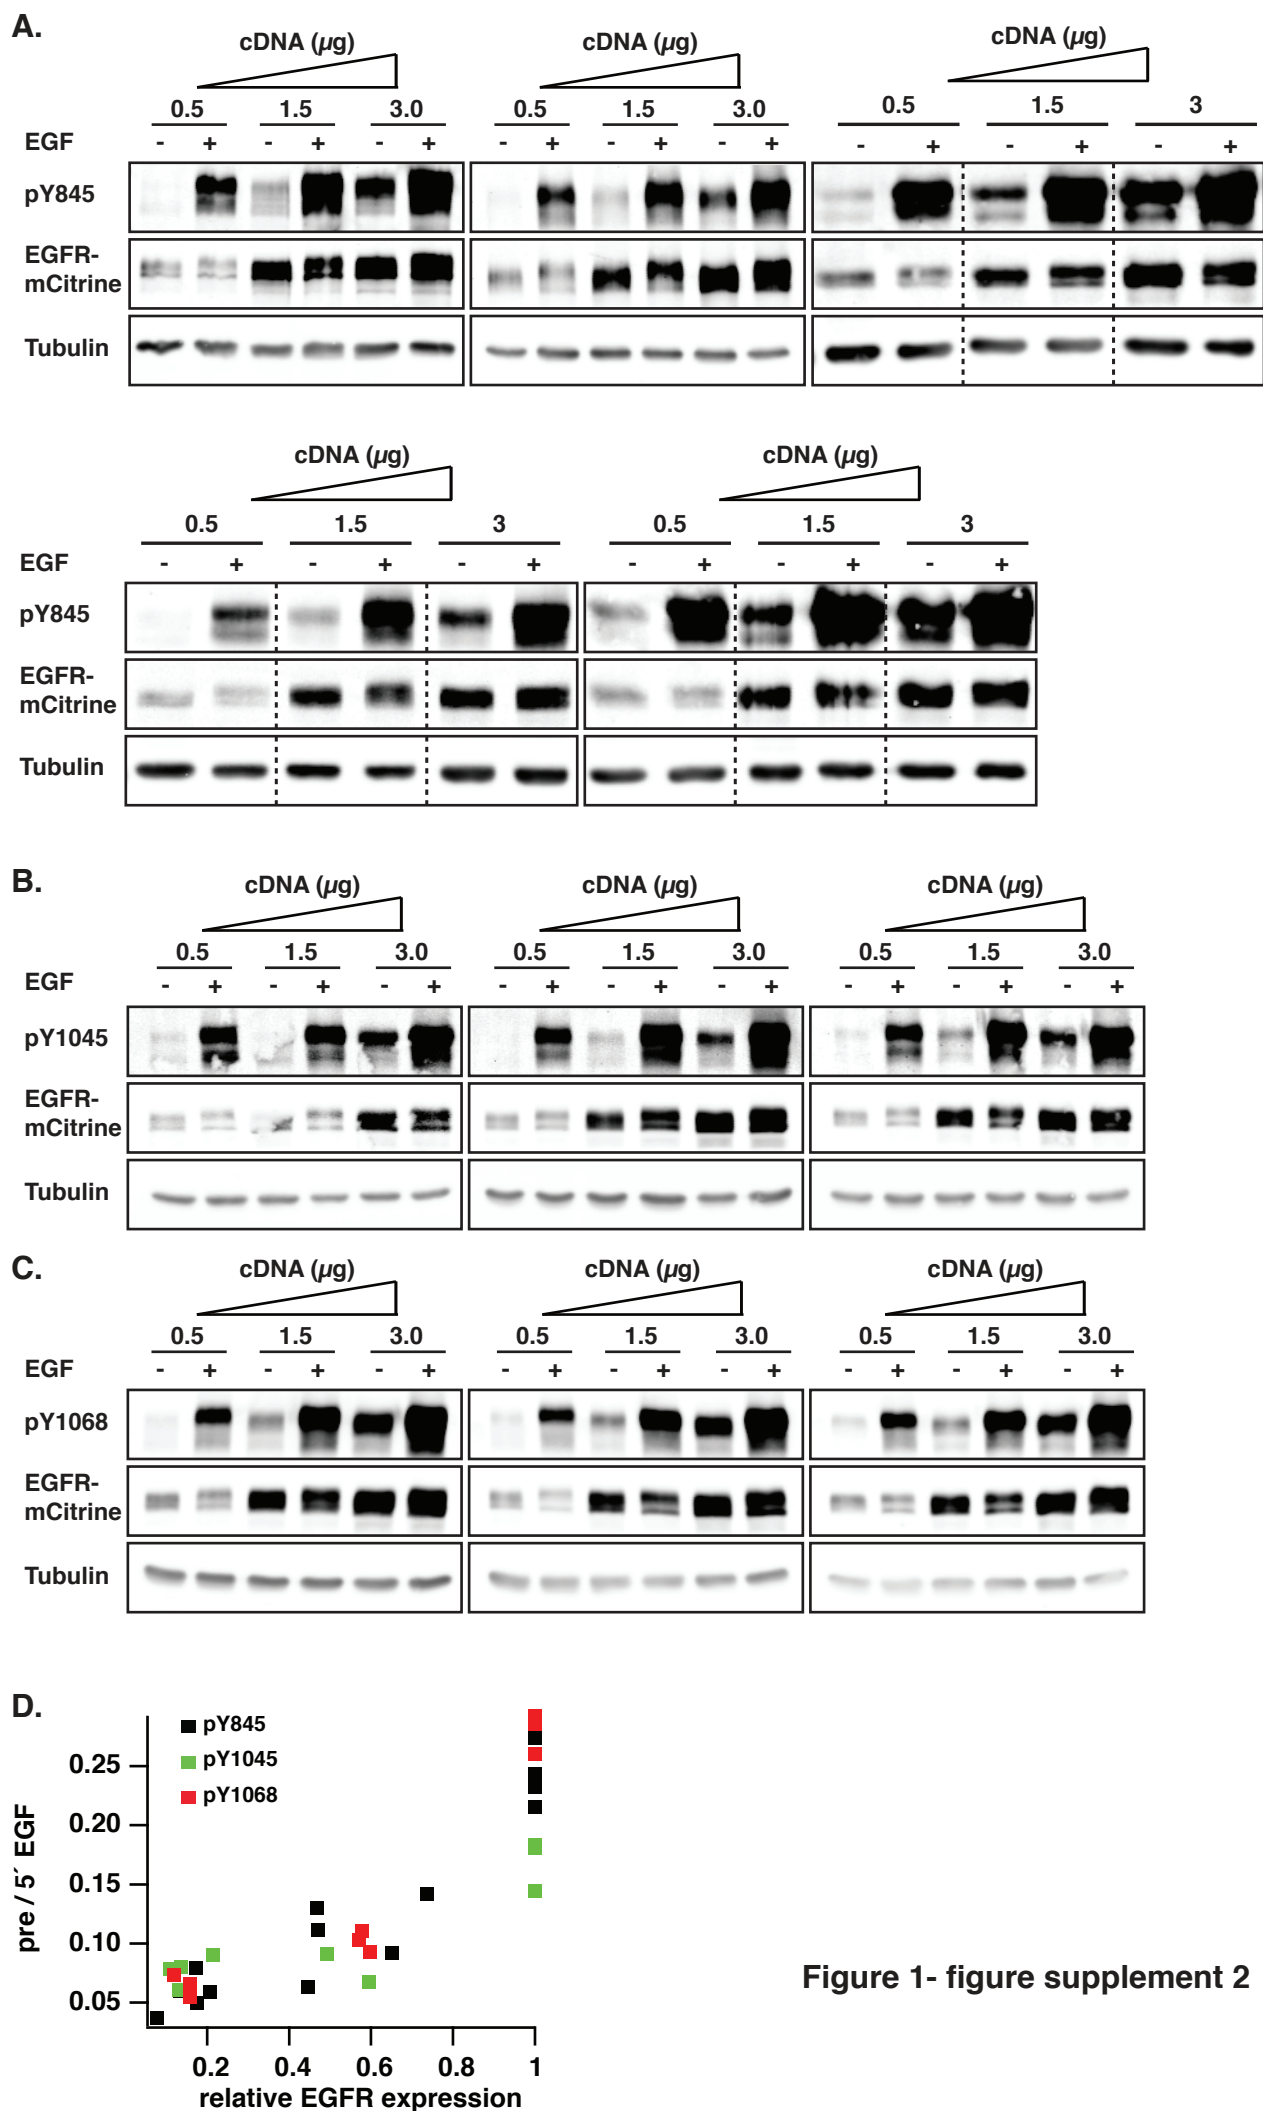

Figure 1- figure supplement 2

Supplement: supp [file elife-12223-supp-v1.zip]

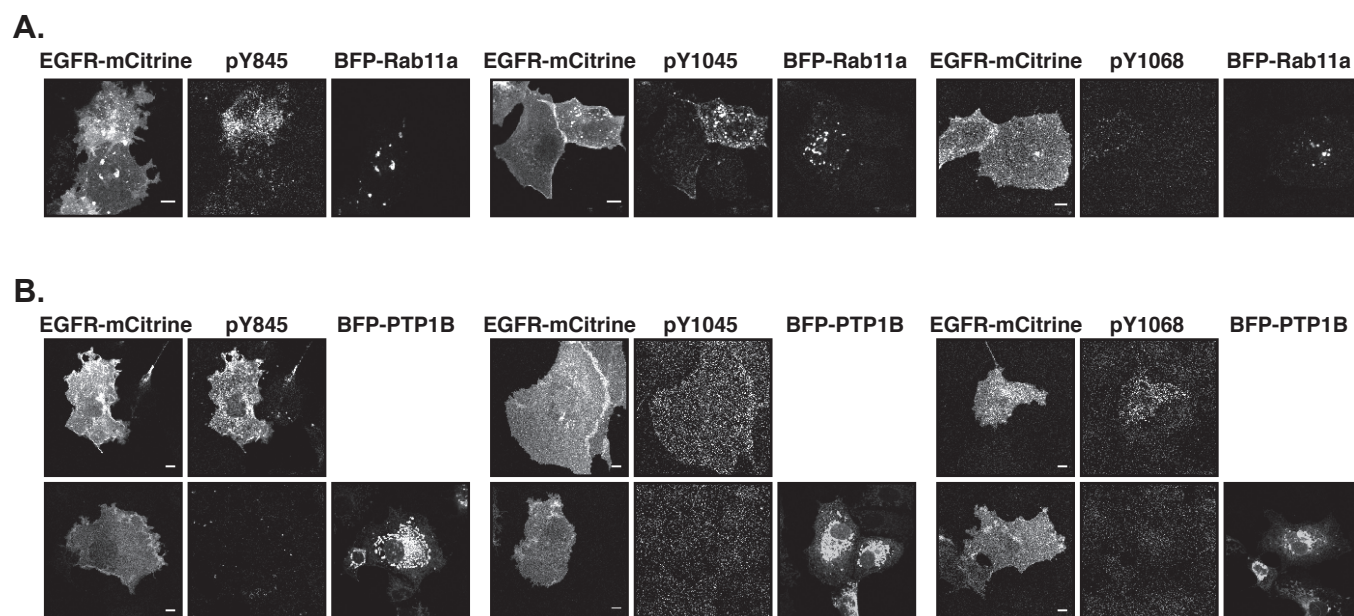

Figure 4 - figure supplement 2

Supplement: supp [file elife-12223-supp-v1.zip]

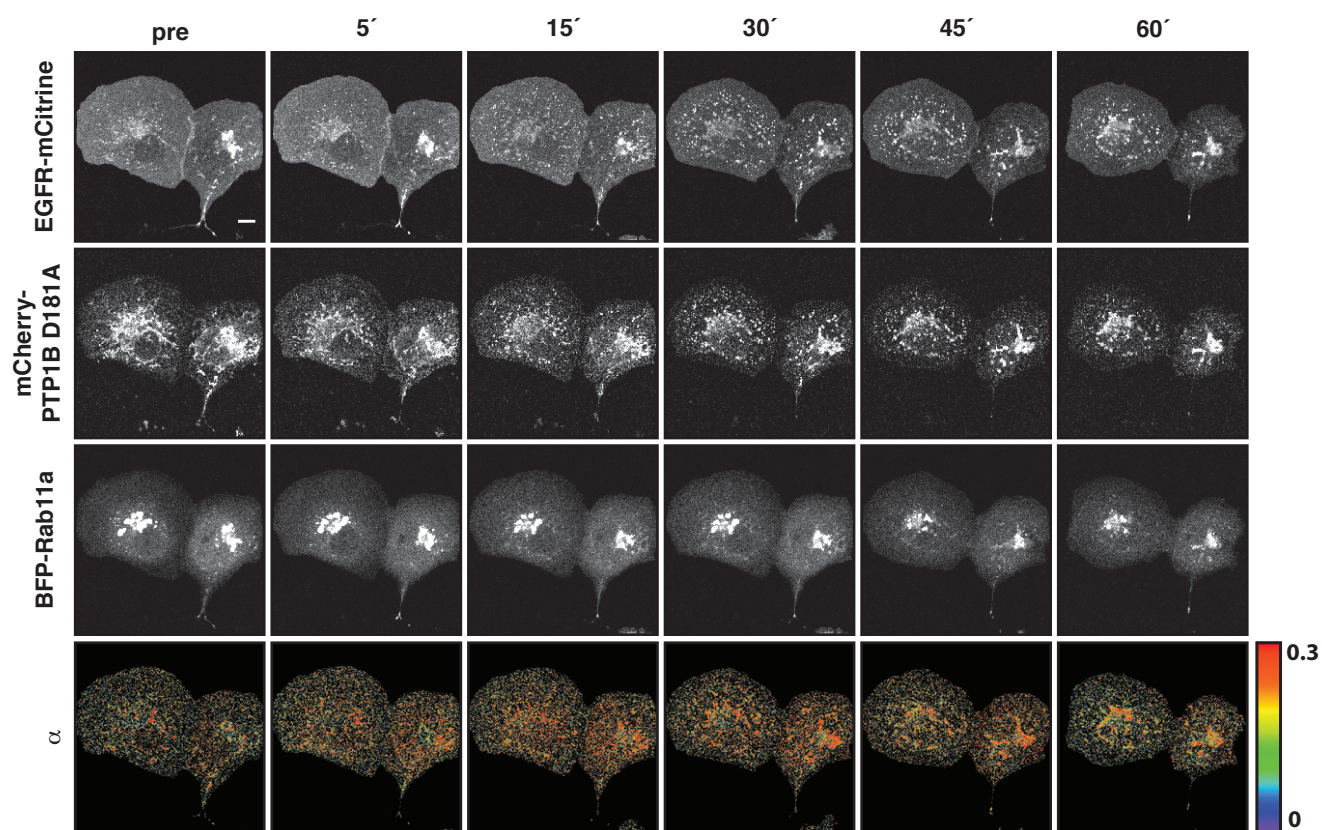

Figure 5 - figure supplement 4

Supplement: supp [file elife-12223-supp-v1.zip]

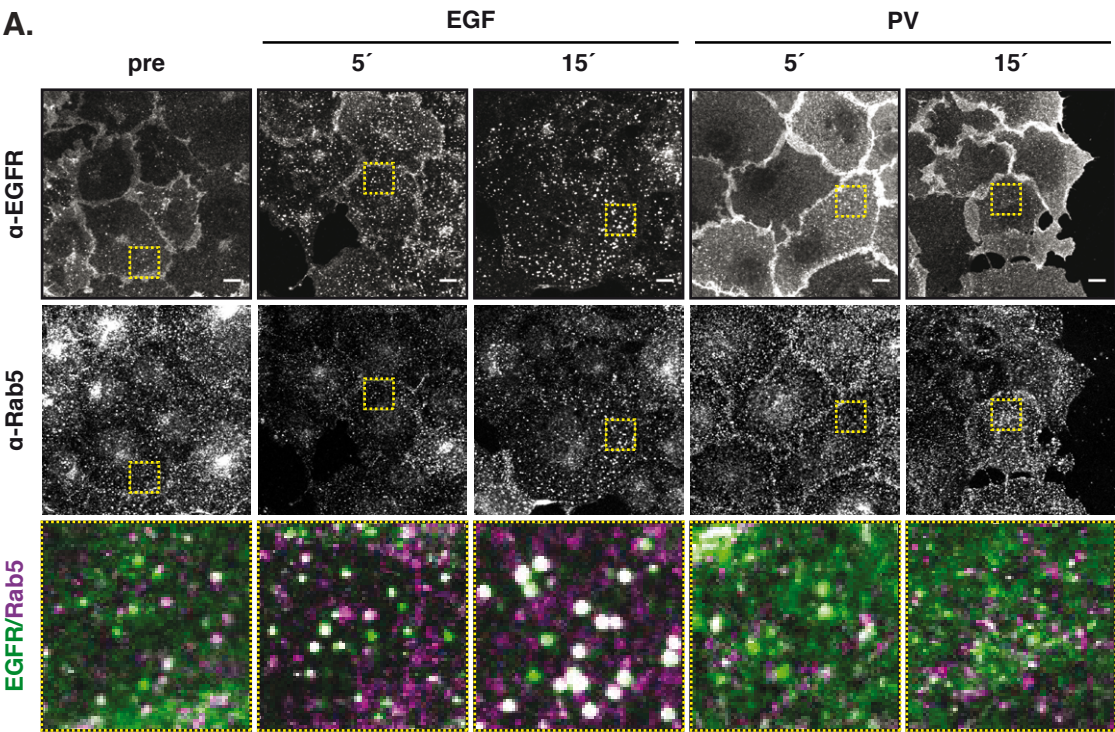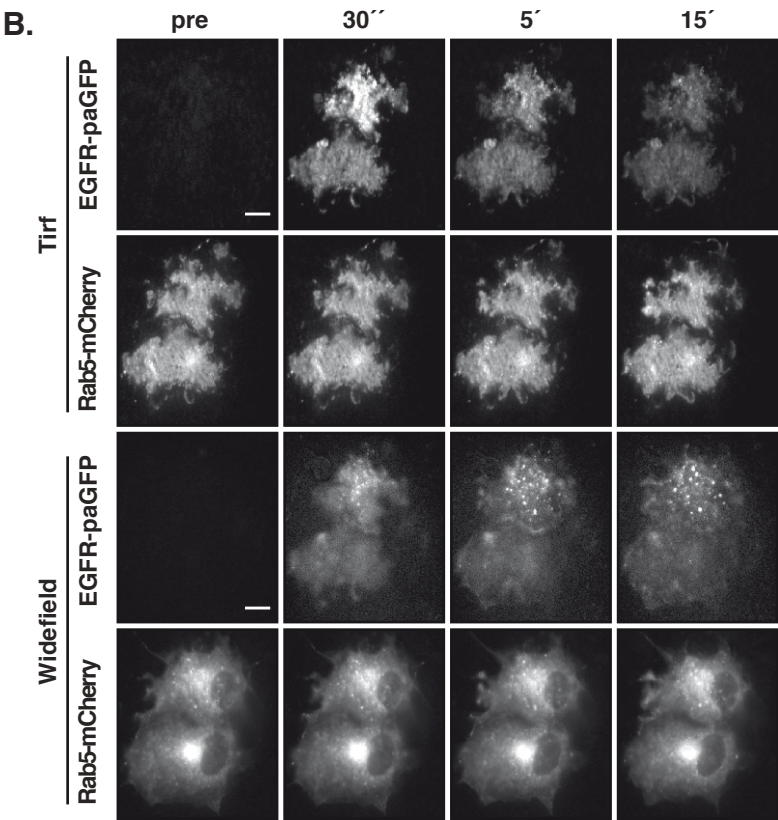

Figure 3 - figure supplement 2

Supplement: supp [file elife-12223-supp-v1.zip]

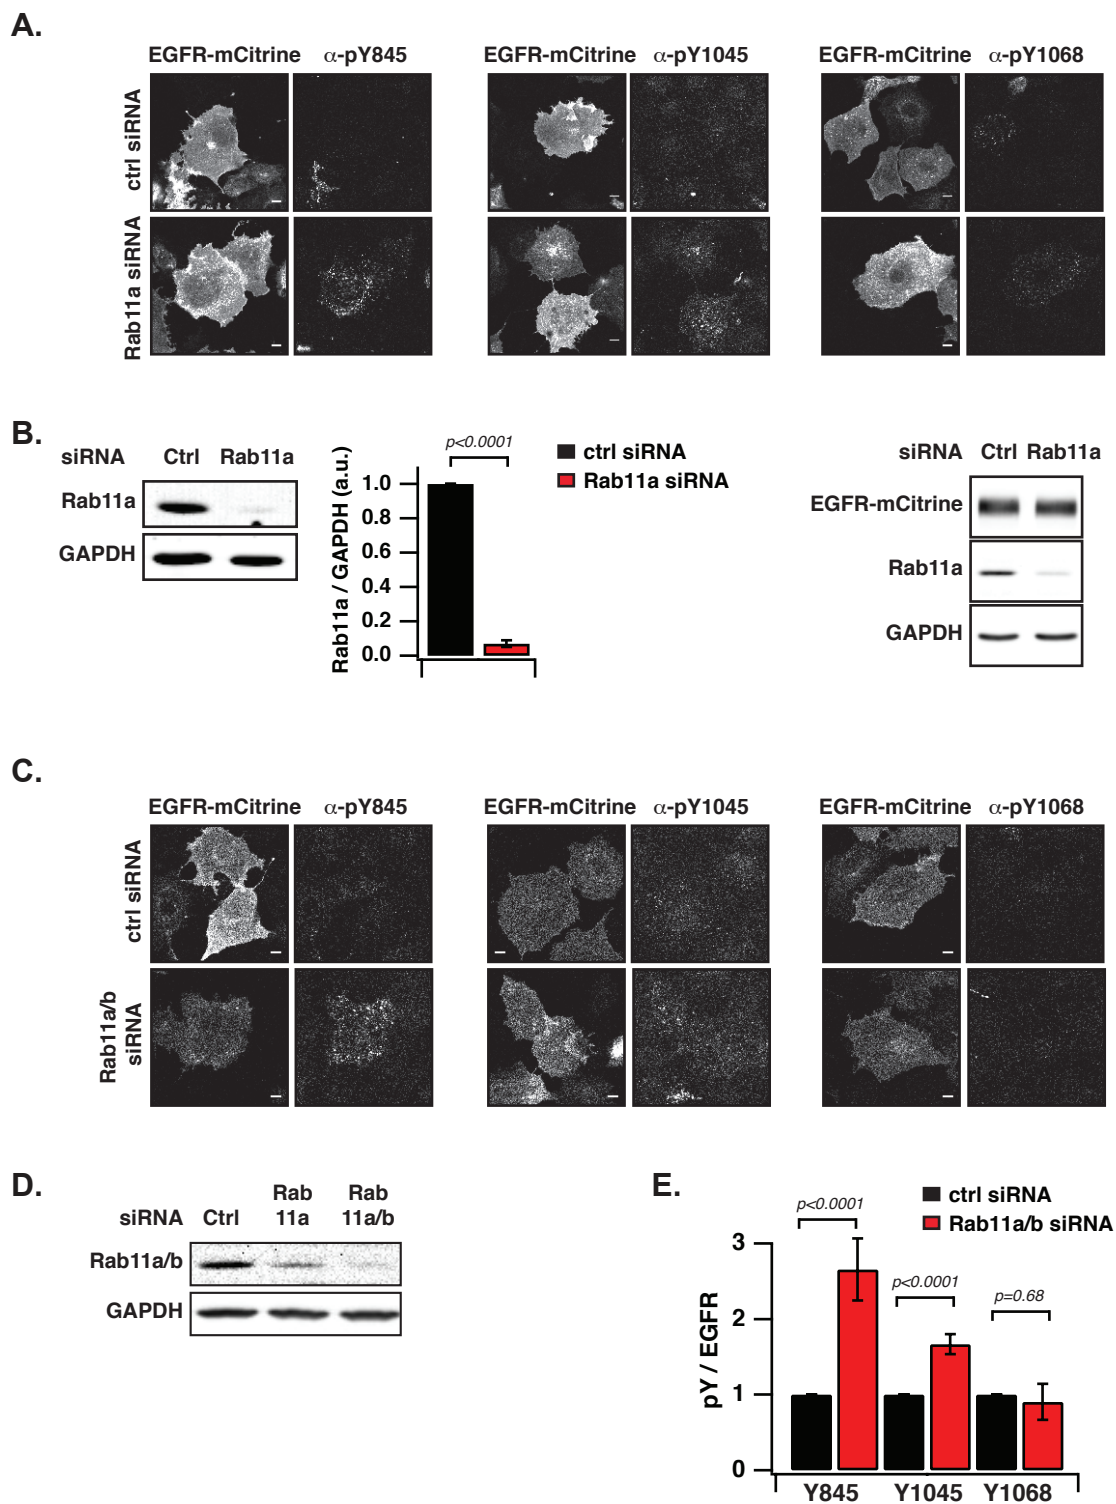

Figure 4 - figure supplement 1

Supplement: supp [file elife-12223-supp-v1.zip]

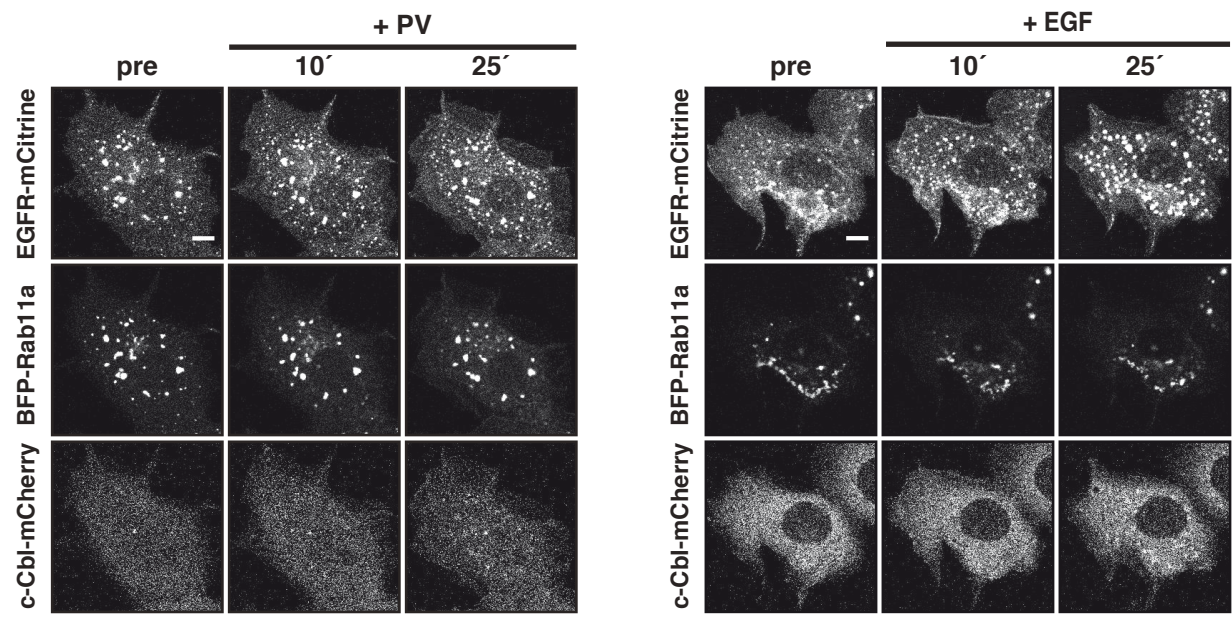

Figure 5 - figure supplement 2

Supplement: supp [file elife-12223-supp-v1.zip]

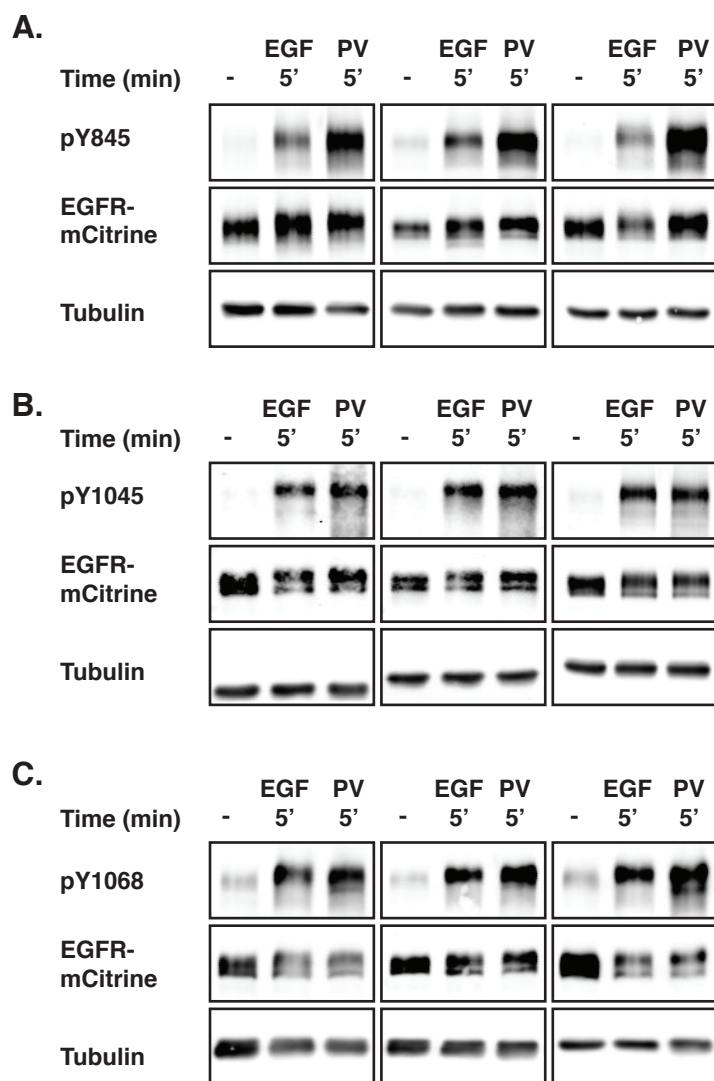

Figure 1 - figure supplement 3

Supplement: supp [file elife-12223-supp-v1.zip]

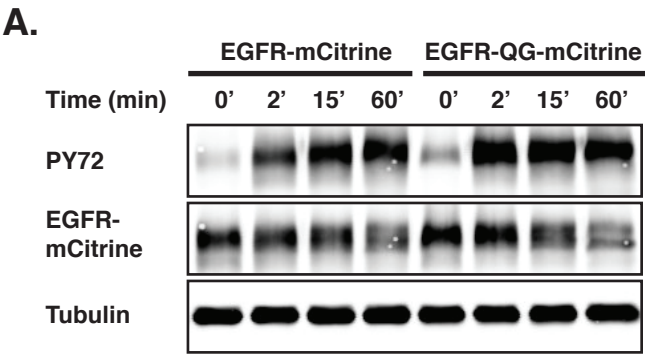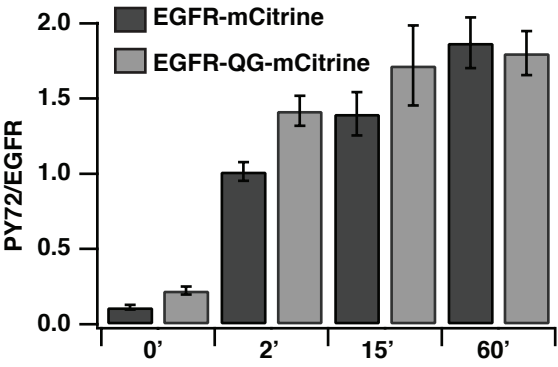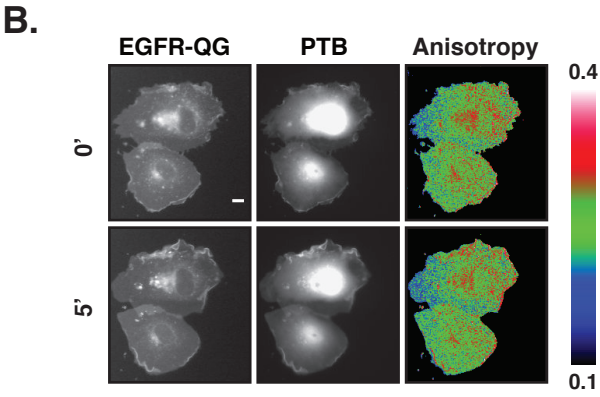

Figure 2- figure supplement 1

Supplement: supp [file elife-12223-supp-v1.zip]
